# Supplementary material
Source: PubMed Central journal article supplement (PMC11386719)
Supplement: PBI-17-1458-s001.pdf [file PBI-17-1458-s001.pdf]

**A strong early-acting wound-inducible promoter, *RbPCD1pro*, activates *cryIac* expression within minutes of wounding to impart efficient protection against insects**

Saurabh Prakash Pandey<sup>1,2</sup>, Amar Pal Singh<sup>1,3</sup>, Shruti Srivastava<sup>1</sup>, K. Chandrashekar<sup>4,5</sup>, Aniruddha P. Sane<sup>1,2\*</sup>

<sup>1</sup>Plant Gene Expression Lab, and <sup>4</sup>Genomics and Molecular Biology Division, CSIR-National Botanical Research Institute, Lucknow-226001 India

<sup>2</sup>Academy of Scientific and Innovative Research (AcSIR), Ghaziabad-201002, India

<sup>3</sup>Current address: National Institute for Plant Genome Research, New Delhi, India

<sup>5</sup>Current address: IARI Regional Centre, Aundh, Pune - 411067, India

## Supplementary figures

### Supplementary Figure S1. Wound-induced activation of *RbPCDIpro::GUS* in different plants.

Histochemical analysis of GUS activity in *RbPCDIpro::GUS* expressing transgenic chickpea and agro-injected cotton sepal, tobacco leaf, *Gladiolus* tepal and rose petal after wounding.

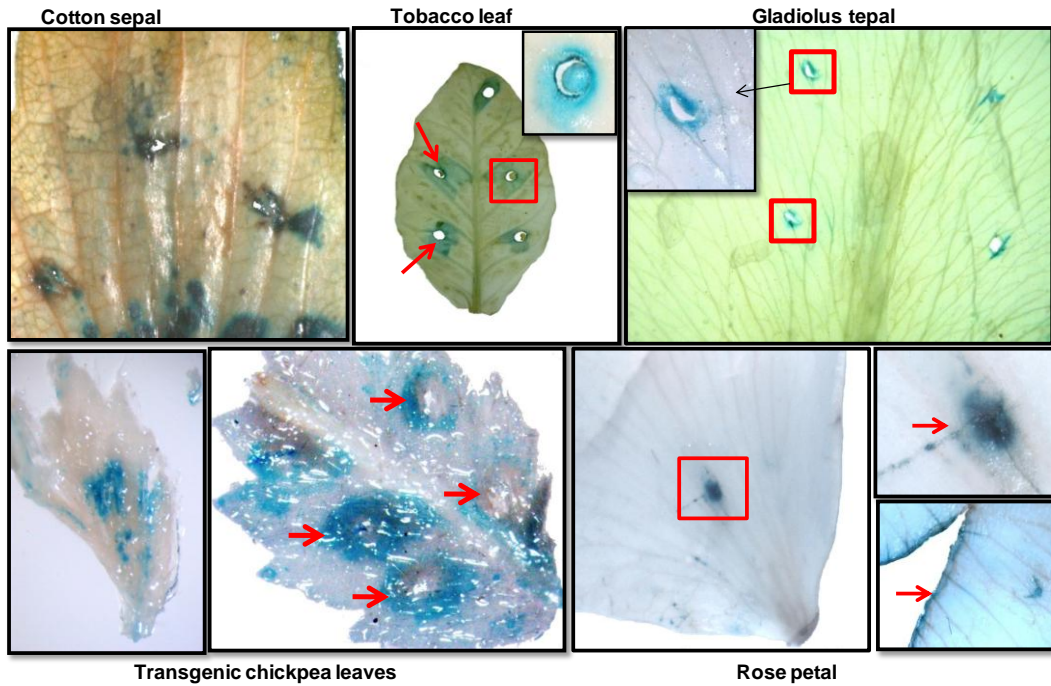

Supplementary Figure S1

**Supplementary Figure S2A.** Schematic representation of the *RbPCD1pro::GUS* expression cassette in pBI101 backbone used for plant transformation.

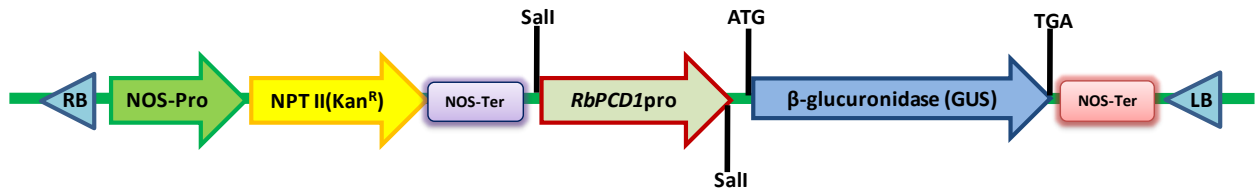

**Supplementary Figure S2A**

**Supplementary Figure S2B.** Schematic representation of the *RbPCD1pro::cryIAc* expression cassette in pBI101 backbone used for plant transformation.

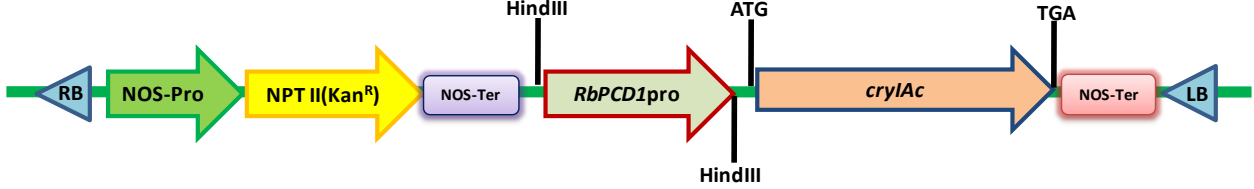

**Supplementary Figure S2B**

**Supplementary Figure S3.** Growth phenotypes of transgenic *Arabidopsis* plants expressing *cryIAC* under the *RbPCDI* promoter.

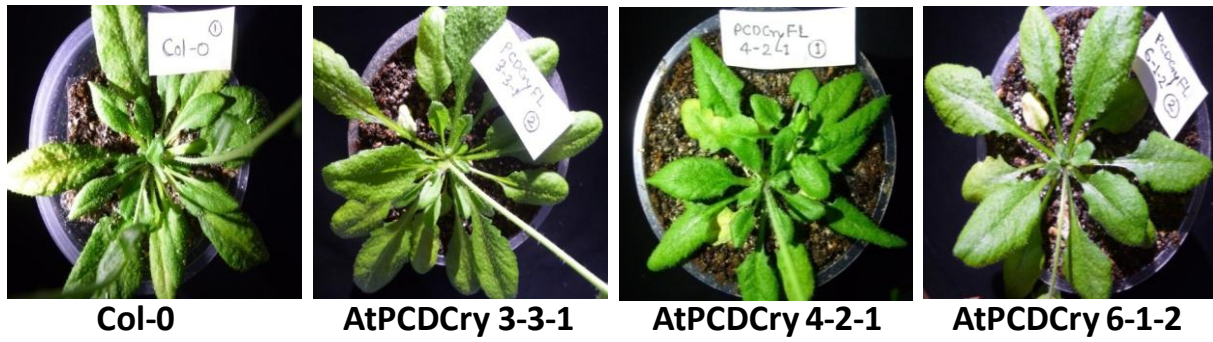

**Supplementary Figure S3**
